# Supplementary material for: Microbiological and Cytokine Profiling of Menstrual Blood for the Assessment of Endometrial Receptivity: A Pilot Study
Source: MDPI journal article supplement (doi:10.3390/biomedicines11051284), 2023-04-26
Supplement: s1 [file s1]

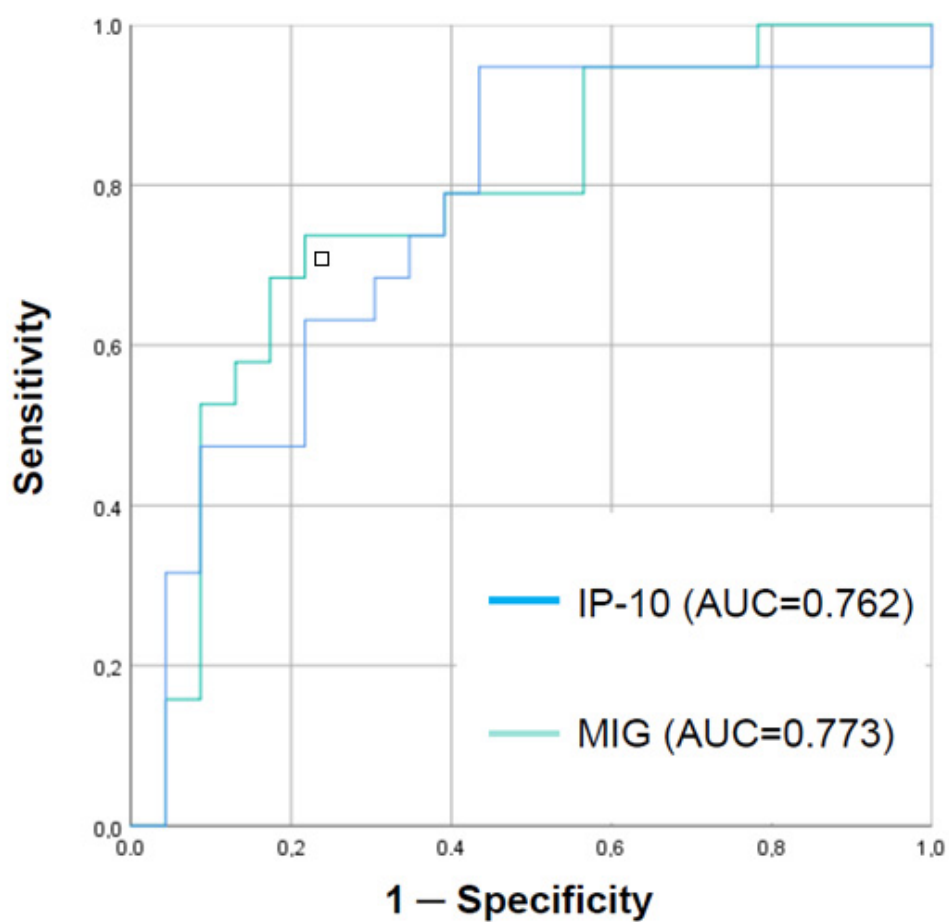

**Figure S1.** ROC curve for the prediction of a successful outcome of ART treatment AUC, area under the curve; ROC, receiver operating characteristics; ART, assisted reproductive technologies.

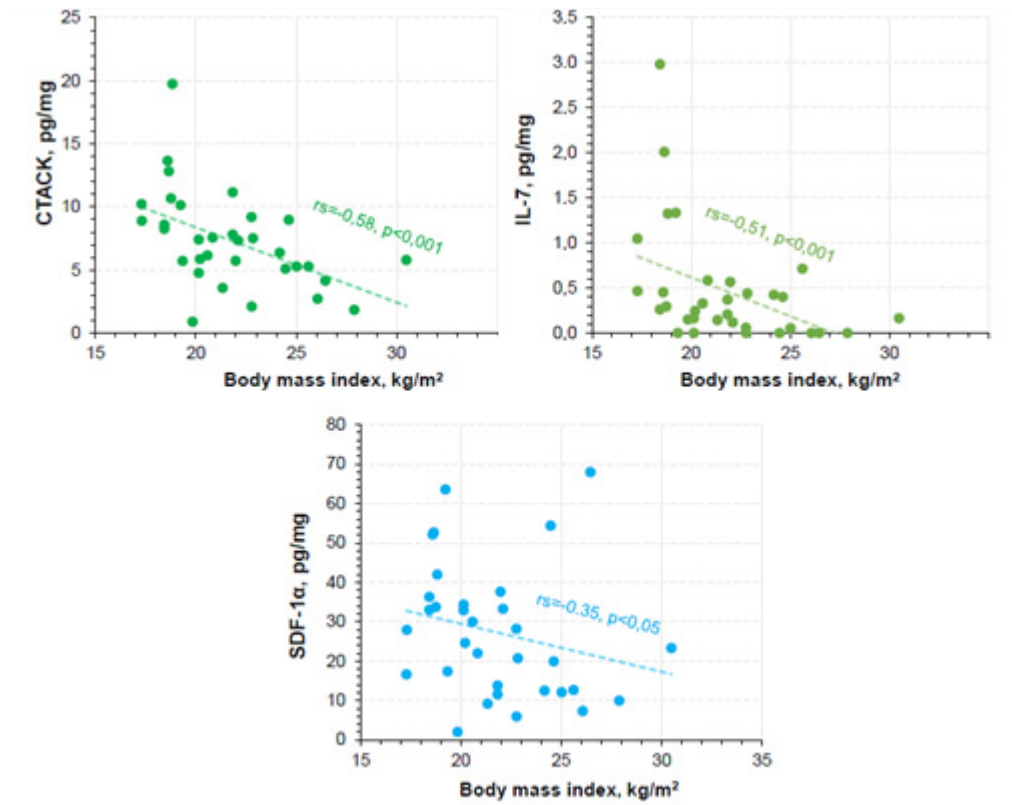

**Figure S2.** Scatterplots for the body-mass indexes and levels of immune mediators. Data are demonstrated only for immune mediators with significant correlations ( $p < 0.05$ ). Data presented as pg of cytokine per mg of total protein in menstrual supernatant. Rs, Spearman's rank correlation coefficient.

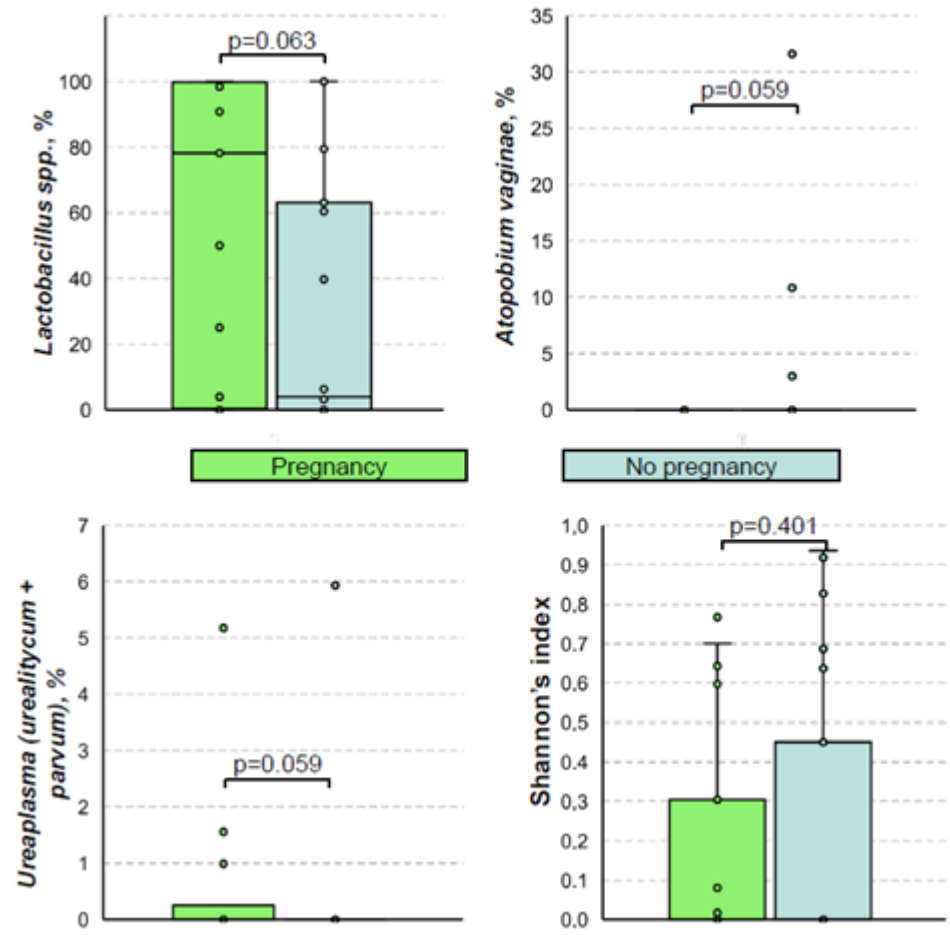

**Figure S3.** Boxplots for the comparison of abundances of microbial taxa and  $\alpha$ -diversities. Data are demonstrated only for taxa with near-significant  $p$ -values.  $p$ -values were calculated using the Mann-Whitney U test. Data presented as abundance (% of total bacterial load measured via amplification of conservative prokaryotic DNA sequence). Shannon's  $\alpha$ -diversity indexes are calculated based on the analyzed microbiota (mostly bacterial vaginosis-associated microorganisms and do not represent the real microbiological structure of the menstrual sediment).

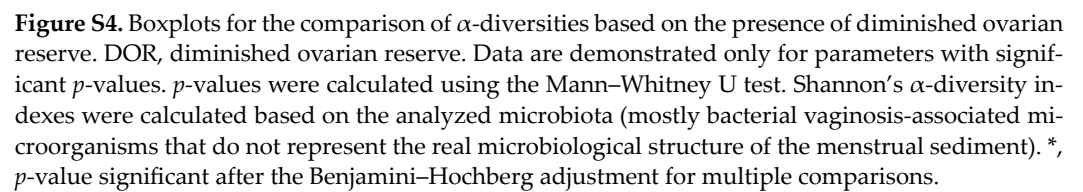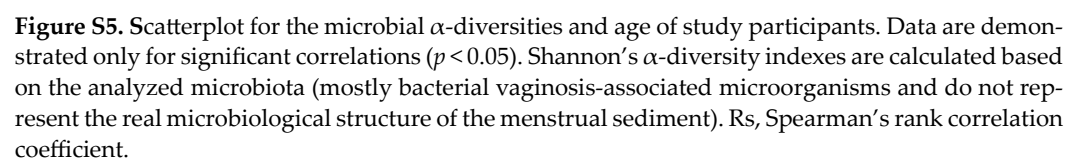

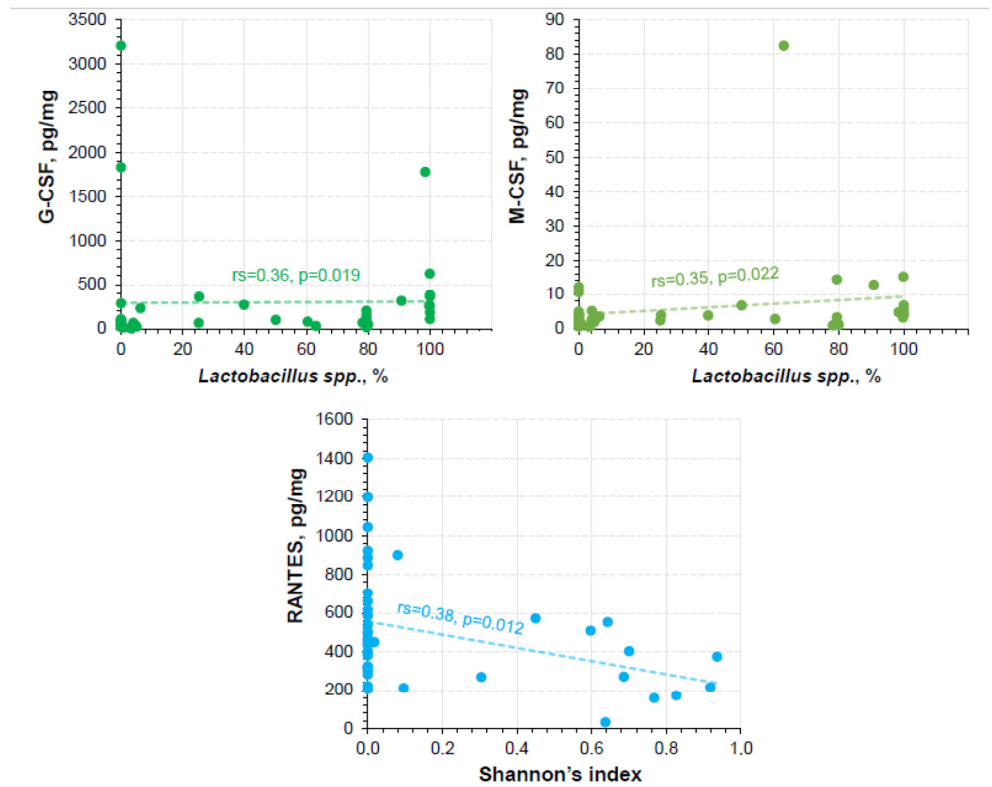

**Figure S6.** Scatterplots for the abundances of *Lactobacillus* spp.,  $\alpha$ -diversities, and levels of immune mediators. Data are demonstrated only for immune mediators with significant correlations ( $p < 0,05$ ). Data presented as abundance (% of total bacterial load measured via amplification of conservative prokaryotic DNA sequence) and pg of cytokine per mg of total protein in menstrual supernatant. Shannon's  $\alpha$ -diversity indexes are calculated based on the analyzed microbiota (mostly bacterial vaginosis-associated microorganisms and do not represent the real microbiological structure of the menstrual sediment). Rs, Spearman's rank correlation coefficient.
