# Supplementary material for: Microbiological and Cytokine Profiling of Menstrual Blood for the Assessment of Endometrial Receptivity: A Pilot Study
Source: MDPI journal article supplement (doi:10.3390/biomedicines11051284), 2023-04-26
Supplement: s1 [file s1]

**Table S2.** Complete results of cytokine analysis.

| <b>Immune Mediator</b> | <b>Pregnancy Group<br/>(n = 19)</b> | <b>No Pregnancy Group<br/>(n = 23)</b> | <b>p-value</b> | <b>Total Cohort<br/>(n = 42)</b> |
|------------------------|-------------------------------------|----------------------------------------|----------------|----------------------------------|
| CTACK                  | 6.155 [5.28; 10.369]                | 7.351 [4.46; 8.978]                    | 0.850          | 7.020 [5.022; 9.036]             |
| Eotaxin                | 1.393 [0.918; 2.013]                | 1.211 [0.69; 1.52]                     | 0.240          | 1.277 [0.816; 1.693]             |
| Basic FGF              | 65.353 [18.497; 105.04]             | 28.84 [9.691; 78.98]                   | 0.230          | 31.254 [17.711; 81.384]          |
| G-CSF                  | 107.519 [65.197; 360.407]           | 65.634 [33.137; 184.054]               | 0.029          | 93.103 [49.708; 261.326]         |
| GM-CSF                 | 0.683 [0.482; 1.597]                | 0.719 [0.367; 2.013]                   | 0.830          | 0.701 [0.372; 1.701]             |
| GRO-alfa               | 313.532 [120.206; 817.382]          | 104.624 [54.064; 660.365]              | 0.027          | 205.284 [71.917; 664.030]        |
| HGF                    | 308.767 [170.272; 694.22]           | 277.272 [77.371; 477.282]              | 0.356          | 293.0195 [142.345; 573.614]      |
| IFN-alfa2              | 0.166 [0; 0.532]                    | 0.255 [0; 0.545]                       | 0.969          | 0.185 [0; 0.535]                 |
| IFN-gamma              | 0.72 [0.212; 2.063]                 | 0.317 [0.207; 0.53]                    | 0.120          | 0.3845 [0.211; 0.916]            |
| IL-1 alfa              | 14.879 [2.83; 30.492]               | 9.359 [5.479; 15.413]                  | 0.426          | 10.066 [5.303; 26.320]           |
| IL-1 beta              | 2.143 [1.005; 3.862]                | 1.279 [0.761; 4.043]                   | 0.390          | 1.285 [0.834; 3.907]             |
| IL-1ra                 | 1378.713 [646.171; 1801.865]        | 911.501 [566.269; 1352.785]            | 0.161          | 1041.721 [608.461; 1714.641]     |
| IL-2                   | 0.464 [0.301; 0.732]                | 0.366 [0.187; 0.737]                   | 0.426          | 0.3975 [0.281; 0.733]            |
| IL-2R alfa             | 6.111 [4.168; 9.848]                | 4.397 [2.674; 6.911]                   | 0.093          | 4.698 [2.964; 7.575]             |
| IL-3                   | 0.134 [0.078; 0.213]                | 0.088 [0.033; 0.219]                   | 0.433          | 0.124 [0.066; 0.214]             |
| IL-4                   | 0.267 [0.148; 0.389]                | 0.209 [0.128; 0.246]                   | 0.053          | 0.213 [0.128; 0.306]             |
| IL-5                   | 5.943 [0; 23.153]                   | 4.187 [0; 10.822]                      | 0.263          | 4.327 [0; 13.453]                |
| IL-6                   | 62.848 [28.498; 233.212]            | 36.413 [21.085; 61.874]                | 0.031          | 42.592 [24.191; 138.207]         |
| IL-7                   | 0.294 [0; 0.713]                    | 0.206 [0.059; 0.404]                   | 0.493          | 0.254 [0.057; 0.456]             |
| IL-8                   | 520.831 [285.648; 1376.679]         | 342.185 [179.236; 550.07]              | 0.060          | 404.328 [264.036; 812.608]       |
| IL-9                   | 31.385 [10.563; 40.98]              | 13.786 [8.472; 24.754]                 | 0.037          | 15.364 [9.773; 35.669]           |
| IL-10                  | 1.357 [1.042; 2.53]                 | 0.954 [0.441; 1.602]                   | 0.073          | 1.177 [0.599; 2.116]             |
| IL-12 (p70)            | 0.165 [0.083; 0.276]                | 0.095 [0.049; 0.201]                   | 0.128          | 0.123 [0.056; 0.251]             |
| IL-12 (p40)            | 23.319 [10.863; 44.754]             | 15.476 [6.307; 29.956]                 | 0.245          | 20.385 [10.751; 33.999]          |
| IL-13                  | 0.046 [0.014; 0.116]                | 0.029 [0.02; 0.055]                    | 0.604          | 0.037 [0.017; 0.065]             |
| IL-15                  | 27.897 [13.482; 53.112]             | 16.602 [9.502; 25.986]                 | 0.079          | 19.826 [12.687; 37.928]          |
| IL-16                  | 34.099 [20.335; 80.356]             | 26.037 [10.457; 43.041]                | 0.071          | 27.625 [15.7193; 51.453]         |
| IL-17                  | 1.107 [0.486; 1.469]                | 0.969 [0.654; 1.653]                   | 0.649          | 1.064 [0.506; 1.634]             |
| IL-18                  | 4.287 [3.29; 5.338]                 | 3.895 [1.688; 5.383]                   | 0.331          | 4.179 [1.929; 5.349]             |
| IP-10                  | 39.098 [21.667; 114.229]            | 17.695 [11.187; 33.574]                | 0.004*         | 26.0065 [15.869; 46.712]         |
| LIF                    | 40.689 [16.101; 49.141]             | 26.307 [16.277; 33.505]                | 0.109          | 27.7535 [16.233; 44.886]         |
| MCP-1                  | 9.302 [4.164; 42.019]               | 3.851 [2.562; 10.563]                  | 0.027          | 6.623 [3.417; 15.210]            |
| MCP-3                  | 0.069 [0; 0.18]                     | 0.078 [0; 0.158]                       | 0.837          | 0.0725 [0; 0.170]                |
| M-CSF                  | 4.782 [3.252; 6.775]                | 2.57 [1.352; 3.526]                    | 0.012*         | 3.317 [1.586; 4.971]             |
| MIF                    | 520.779 [380.784; 1655.352]         | 564.719 [215.705; 978.885]             | 0.261          | 542.749 [241.071; 1193.262]      |
| MIG                    | 15.428 [7.753; 31.222]              | 7.168 [4.318; 10.97]                   | 0.003*         | 10.345 [4.919; 19.360]           |
| MIP-1 alfa             | 2.175 [1.093; 4.191]                | 1.387 [1.153; 2.855]                   | 0.337          | 1.95 [1.138; 3.318]              |
| MIP-1 beta             | 41.133 [24.824; 55.916]             | 26.217 [12.237; 74.974]                | 0.503          | 39.852 [16.787; 59.492]          |
| beta-NGF               | 1.146 [0.725; 2.169]                | 1.005 [0.539; 2.081]                   | 0.640          | 1.103 [0.680; 2.103]             |
| PDGF-BB                | 24.33 [17.019; 66.075]              | 36.107 [18.308; 66.783]                | 0.695          | 31.105 [17.986; 66.252]          |
| RANTES                 | 438.391 [317.695; 704.62]           | 435.46 [270.846; 572.891]              | 0.536          | 436.926 [294.749; 594.091]       |
| SCF                    | 3.102 [2.272; 5.966]                | 2.007 [1.886; 3.413]                   | 0.018*         | 2.6485 [1.959; 3.804]            |
| SCGF-beta              | 7045.489 [4375.593; 9077.084]       | 5419.363 [2869.97; 8252.371]           | 0.120          | 5845.911 [3313.462; 8297.142]    |
| SDF-1 alfa             | 29.952 [20.691; 41.918]             | 19.93 [11.542; 32.89]                  | 0.039          | 23.0875 [12.614; 33.897]         |
| TNF-alfa               | 7.772 [4.667; 13.895]               | 6.14 [3.253; 7.022]                    | 0.083          | 6.252 [4.033; 9.678]             |
| TNF-beta               | 49.755 [16.1; 58.076]               | 21.796 [12.253; 36.455]                | 0.031          | 25.137 [14.621; 53.560]          |

|       |                        |                       |        |                        |
|-------|------------------------|-----------------------|--------|------------------------|
| TRAIL | 8.769 [5.785; 17.507]  | 4.7 [2.645; 8.433]    | 0.010* | 6.63 [3.111; 11.442]   |
| VEGF  | 21.837 [5.359; 28.543] | 8.522 [5.093; 15.753] | 0.067  | 12.960 [5.293; 22.714] |

Data presented as pg of analyte per mg of total protein. *p*-values were calculated using Mann-Whitney U test and are presented for the comparison of groups “pregnancy” vs. “no pregnancy”. \*, *p*-values significant after the Benjamini-Hochberg adjustment for multiple comparisons.

**Table S3.** Complete results of correlation analysis for hemoglobin and all the studied immune mediators.

| Immune Mediator | Spearman's Rank Correlation Coefficient for Hemoglobin | <i>p</i> -Value |
|-----------------|--------------------------------------------------------|-----------------|
| CTACK           | 0.533                                                  | 0.001*          |
| Eotaxin         | 0.378                                                  | 0.014*          |
| Basic FGF       | 0.181                                                  | 0.252           |
| G-CSF           | 0.045                                                  | 0.775           |
| GM-CSF          | 0.311                                                  | 0.045*          |
| GRO-alfa        | 0.005                                                  | 0.975           |
| HGF             | 0.271                                                  | 0.082           |
| IFN-alfa2       | 0.169                                                  | 0.284           |
| IFN-gamma       | -0.029                                                 | 0.854           |
| IL-1 alfa       | 0.258                                                  | 0.099           |
| IL-1 beta       | 0.262                                                  | 0.094           |
| IL-1ra          | 0.281                                                  | 0.071           |
| IL-2            | 0.273                                                  | 0.080           |
| IL-2R alfa      | 0.226                                                  | 0.150           |
| IL-3            | 0.259                                                  | 0.098           |
| IL-4            | 0.323                                                  | 0.037*          |
| IL-5            | -0.040                                                 | 0.803           |
| IL-6            | -0.048                                                 | 0.761           |
| IL-7            | 0.286                                                  | 0.066           |
| IL-8            | 0.126                                                  | 0.427           |
| IL-9            | 0.429                                                  | 0.005*          |
| IL-10           | 0.340                                                  | 0.027*          |
| IL-12 (p70)     | 0.187                                                  | 0.235           |
| IL-12 (p40)     | 0.297                                                  | 0.056           |
| IL-13           | 0.218                                                  | 0.166           |
| IL-15           | 0.244                                                  | 0.120           |
| IL-16           | 0.170                                                  | 0.282           |
| IL-17           | 0.237                                                  | 0.130           |
| IL-18           | 0.432                                                  | 0.004*          |
| IP-10           | -0.103                                                 | 0.516           |
| LIF             | 0.133                                                  | 0.400           |
| MCP-1           | -0.114                                                 | 0.473           |
| MCP-3           | 0.064                                                  | 0.688           |
| M-CSF           | 0.234                                                  | 0.135           |
| MIF             | -0.006                                                 | 0.970           |
| MIG             | 0.126                                                  | 0.428           |
| MIP-1 alfa      | 0.271                                                  | 0.083           |
| MIP-1 beta      | 0.365                                                  | 0.017*          |
| beta-NGF        | 0.317                                                  | 0.041*          |
| PDGF-BB         | 0.616                                                  | 0.001*          |
| RANTES          | 0.651                                                  | 0.001*          |

|            |        |        |
|------------|--------|--------|
| SCF        | 0.333  | 0.031* |
| SCGF-beta  | 0.243  | 0.121  |
| SDF-1 alfa | 0.454  | 0.003* |
| TNF-alfa   | 0.153  | 0.334  |
| TNF-beta   | 0.452  | 0.003* |
| TRAIL      | -0.139 | 0.381  |
| VEGF       | 0.022  | 0.888  |

Correlation was determined for values not normalized by total protein levels. \*, *p*-values less than 0.05.
