# Supplementary material for: Microbiological and Cytokine Profiling of Menstrual Blood for the Assessment of Endometrial Receptivity: A Pilot Study
Source: Biomedicines. 2023 Apr 26;11(5):1284. doi: 10.3390/biomedicines11051284 (PMC10215904; doi:10.3390/biomedicines11051284)
Supplement: Supplementary file 1 [file biomedicines-11-01284-s001.zip › Table S1_Jain_et_al.xlsx]

## Sheet: Clinical data
Patients' ID	Age	BMI	Tubo-peritoneal factor	Endometriosis	Diminished ovarian reserve	Unknown factor	Uterine factor	Endocrinologic factor	Male factor	Uterine adhesions	Uterine fibroids	Recurrent pregnancy loss	Recurrent implantation failure	ART procedure	IVF cycle	Frozen ebmryo trasnfer	PGT	Pregnancy achieved in the examined cycle	Prolongation of pregnancy (3 months) achieved
1	51	24.1672	0	1	1	0	1	0	1	1	1	1	0	IVF/ICSI	Stimulated	1	0	0	0
2	31	20.83	0	0	0	0	0	0	0	0	0	0	0	IVF/ICSI	Stimulated	1	0	0	0
3	40	N/A	0	1	1	0	0	0	0	0	0	0	0	IVF	Stimulated	1	1	0	0
5	38	21.83	1	1	0	0	0	0	0	0	0	0	0	IVF/ICSI	Stimulated	1	1	0	0
7	45	17.284	0	0	1	0	0	0	0	0	0	0	0	IVF	Stimulated	1	1	0	0
9	33	20.5761	0	0	0	0	0	0	0	0	0	0	0	IVF/ICSI	Stimulated	1	0	1	1
10	36	18.8268	0	0	0	0	0	0	0	0	0	0	0	IVF	Natural	1	1	1	1
11	24	20.202	0	0	0	0	0	0	0	0	0	0	0	IVF	Stimulated	1	0	1	1
12	34	18.424	1	0	0	0	0	0	0	0	0	0	0	IVF	Stimulated	1	0	1	1
13	33	N/A	0	1	0	0	0	0	0	0	0	0	0	IVF	Stimulated	1	0	0	0
14	37	22.7732	1	1	0	0	1	1	1	0	0	0	0	IVF/ICSI	Stimulated	1	1	1	1
15	36	24.4646	0	0	1	0	0	0	0	0	0	0	0	IVF/ICSI	Stimulated	1	0	1	1
16	48	25.0135	0	0	1	0	0	0	0	0	0	0	1	IVF/ICSI	Stimulated	1	1	0	0
17	38	17.301	1	0	0	0	0	0	0	0	0	0	0	IVF	Stimulated	1	1	1	1
18	35	22.1003	1	0	0	0	0	0	0	0	0	0	0	IVF	Stimulated	1	0	0	0
19	35	19.3337	0	1	0	0	0	0	0	0	0	0	0	IVF	Stimulated	1	0	1	1
20	32	19.8352	0	0	0	1	0	0	0	0	0	0	0	IVF	Stimulated	1	0	1	1
21	41	25.6055	0	0	1	0	0	0	0	0	0	0	0	IVF	Stimulated	1	1	1	1
22	42	22.8374	1	0	1	0	0	0	0	0	0	0	0	IVF/ICSI	Stimulated	1	0	1	1
23	37	N/A	0	0	0	1	0	0	0	0	0	0	0	IVF	Stimulated	1	1	0	0
24	31	N/A	0	0	0	0	0	0	0	0	0	0	1	IVF/ICSI	Stimulated	1	1	0	0
25	41	18.424	0	0	1	0	0	0	0	0	0	0	1	IVF/ICSI	Stimulated	1	1	0	0
26	46	21.3294	0	0	1	0	0	0	0	0	0	0	0	IVF/ICSI	Stimulated	1	1	0	0
27	38	21.83	1	1	0	0	0	0	0	0	0	0	0	IVF/ICSI	Stimulated	1	1	0	0
28	28	18.75	0	0	0	0	0	0	0	0	0	0	0	IVF	Stimulated	1	0	1	1
29	35	N/A	0	0	0	1	0	0	0	0	1	0	0	IVF	Stimulated	1	0	0	0
30	40	20.1348	0	1	1	0	0	0	0	0	0	0	0	IVF	Stimulated	1	1	0	0
31	34	N/A	0	1	0	1	0	0	0	0	0	0	0	IVF/ICSI	Stimulated	1	0	0	0
32	50	N/A	1	1	0	0	0	0	0	0	0	0	0	IVF	Stimulated	1	1	1	1
33	33	24.623	0	0	1	0	0	0	0	0	0	0	0	IVF/ICSI	Stimulated	1	0	0	0
34	45	21.9713	0	0	1	0	0	0	0	0	0	0	0	IVF/ICSI	Stimulated	1	0	1	1
35	46	26.0617	0	0	1	0	0	0	0	0	0	0	1	IVF/ICSI	Stimulated	1	1	0	0
36	26	27.8852	0	0	0	0	0	0	0	0	0	0	0	IVF	Stimulated	1	0	0	0
37	32	26.4463	0	0	0	1	0	0	0	0	0	0	0	IVF	Stimulated	1	0	1	1
38	29	18.6453	0	0	0	0	0	0	0	0	0	0	0	IVF	Stimulated	1	0	1	1
39	40	18.5901	0	0	1	0	0	0	0	0	0	0	0	IVF/ICSI	Stimulated	1	0	0	0
40	34	N/A	0	0	0	0	0	0	0	0	0	0	0	IVF/ICSI	Stimulated	1	1	1	1
41	35	N/A	0	0	0	0	0	0	0	0	0	0	1	IVF/ICSI	Stimulated	1	0	1	1
42	19	30.4832	0	0	0	0	0	0	0	0	0	0	0	IVF	Stimulated	1	0	1	1
43	40	20.1348	0	1	1	0	0	0	0	0	0	0	0	IVF	Stimulated	1	1	0	0
44	32	19.2277	0	0	0	0	0	0	0	0	0	0	1	IVF/ICSI	Stimulated	1	0	0	0
45	41	22.7615	0	0	1	0	0	0	0	0	0	0	0	IVF/ICSI	Stimulated	1	1	0	0

## Sheet: Microbiological analysis
Patients' ID	Human DNA (copies per rxn mixture)	Total bacterial DNA (copies per rxn mixture)	Lactobacillus spp., %	Enterobacteriaceae, %	Streptococcus spp., %	Staphylococcus spp., %	Gardnerella vaginalis + Prevotella bivia + Porphyromonas spp., %	Eubacterium spp., %	Sneathia spp.+ Leptotrichia spp.+ Fusobacterium spp., %	Megasphaera spp. + Veillonella spp. + Dialister spp., %	Lachnobacterium spp. + Clostridium spp., %	Mobiluncus spp. + Corynebacterium spp., %	Peptostreptococcus spp., %	Atopobium vaginae, %	Candida spp., %	Mycoplasma hominis, %	Ureaplasma (urealyticum + parvum), %	Mycoplasma genitalium	Trichomonas vaginalis	Neisseria gonorrhoeae	Chlamydia trachomatis	HSV2	CMV	HSV1
1	10000	100	0	0	0	0	0	0	0	0	0	0	0	0	0	0	0	-	-	-	-	-	-	-
2	316228	5011.87	60.43	0	19.11	0	19.11	0	0	0	0	0	0	0	0	0	0	-	-	-	-	-	-	-
3	316228	1584.89	100	0	0	0	0	0	0	0	0	0	0	0	0	0	0	-	-	-	-	-	-	-
5	1.99526e+06	501.187	0	0	0	0	0	0	0	0	0	0	0	0	0	0	0	-	-	-	-	-	-	-
7	630957	7943.28	0	100	0	0	0	0	0	0	0	0	0	0	0	0	0	-	-	-	-	-	-	-
9	630957	2511.89	100	0	0	0	0	0	0	0	0	0	0	0	0	0	0	-	-	-	-	-	-	-
10	251189	12788.8	98.4398	0	0	0	0	0	0	0	0	0	0	0	0	0	1.56017	-	-	-	-	-	-	-
11	199526	199526	4	0	0	0	70.03	20.62	0	0	0	0	0	0	0	0	0	-	-	-	-	-	-	-
12	100000	19952.6	99.9	0	0	0	0	0.00501187	0	0	0	0	0	0	0	0	0	-	-	-	-	-	-	-
13	501187	670.768	4.71441	0	0	0	0	0	0	0	0	0	0	0	0	0	5.93509	-	-	-	-	-	-	-
14	501187	19952.6	50.1187	0	0	0	0	19.9526	0	0	0	0	0	0	0	0	0	-	-	-	-	-	-	-
15	19952.6	125893	100	0	0	0	0	0	0	0	0	0	0	0	0	0	0	-	-	-	-	-	-	-
16	316228	7943.28	80	0	0	0	0	19.9526	0	0	0	0	0	0	0	0	0	-	-	-	-	-	-	-
17	1.25893e+06	398.107	25.1189	0	0	0	0	0	0	0	0	0	0	0	0	0	0	-	-	-	-	-	-	-
18	630957	7943.28	100	0	0	0	0	0	0	0	0	0	0	0	0	0	0	-	-	-	-	-	-	-
19	158489	1584.89	100	0	0	0	0	0	0	0	0	0	0	0	0	0	0	-	-	-	-	-	-	-
20	2.51189e+06	5642.83	90.8	0	0	0	0	0	0	0	0	0	0	0	0	0	5.18	-	-	-	-	-	-	-
21	1.25893e+06	6309.57	79.4328	0	0	0	0	0	0	0	0	0	0	0	0	0	0	-	-	-	-	-	-	-
22	1.99526e+06	5011.87	0.316228	0	38.43	0	0	0	0	33.09	0	0	0	0	0	0	0	-	-	-	-	-	-	-
23	1.58489e+06	501.187	3.16228	0	0	0	0	0	0	0	0	0	0	0	0	0	0	-	-	-	-	-	-	-
24	1.99526e+06	794.328	0	0	0	0	0	0	0	0	0	0	0	0	100	0	0	-	-	-	-	-	-	-
25	1.25893e+07	1258.93	3.98107	0	0	0	0	0	0	0	0	0	0	0	0	0	0	-	-	-	-	-	-	-
26	501187	3981.07	79.4328	0	0	0	0	0	0	0	0	0	0	0	0	0	0	-	-	-	-	-	-	-
27	1.58489e+06	15848.9	0.794328	0	0	0	75.23	12.12	0	0	0	0	0	10.84	0	0	0	-	-	-	-	-	-	-
28	1.25893e+06	3162.28	79.4328	0	0	0	0	0	0	0	0	0	0	0	0	0	0	-	-	-	-	-	-	-
29	5.01187e+06	2511.89	63.0957	0	0	0	0	0	0	0	0	0	0	31.6228	0	0	0	-	-	-	-	-	-	-
30	5011.87	1995.26	79.4328	0	0	0	0	0	0	0	0	0	0	0	0	0	0	-	-	-	-	-	-	-
31	1000000	501.187	5.01187	0	0	0	0	0	0	0	0	0	0	0	0	0	0	-	-	-	-	-	-	-
32	794328	1258.93	0	0	0	0	0	0	0	0	0	0	0	0	0	0	0	-	-	-	-	-	-	-
33	125893	316.228	0	0	0	0	0	0	0	0	0	0	0	0	0	0	0	-	-	-	-	-	-	-
34	7.94328e+06	1000	0	0	0	0	0	0	0	0	0	0	0	0	0	0	0	-	-	-	-	-	-	-
35	501187	398.107	0	0	0	0	0	0	0	0	0	0	0	0	100	0	0	-	-	-	-	-	-	-
36	3.98107e+06	63095.7	0	0	0	0	15.9	4.94	70.2	5.01187	0	0	0	3.01	0	0	0	-	-	-	-	-	-	-
37	2511.89	1015.85	78.1935	0	0	0	0	0	0	0	0	0	0	0	0	0	1.56017	-	-	-	-	-	-	-
38	158489	632542	99.7494	0	0	0	0	0	0	0	0	0	0	0	0	0	0.250559	-	-	-	-	-	-	-
39	630957	794.328	39.8107	0	0	0	0	0	0	0	0	0	0	0	0	0	0	-	-	-	-	-	-	-
40	125893	199.526	0	0	0	0	0	0	0	0	0	0	0	0	0	0	0	-	-	-	-	-	-	-
41	316228	3981.07	0	0	0	0	0	0	0	0	0	0	0	0	0	0	0	-	-	-	-	-	-	-
42	316228	3193.9	25.3	0	0	0	68.64	0	0	0	0	0	0	0	0	0	0.990099	-	-	-	-	-	-	-
43	316228	630.957	0	0	0	0	0	0	0	0	0	0	0	0.316228	0	0	0	-	-	-	-	-	-	-
44	10000	251.189	6.30957	0	0	0	0	0	0	0	0	0	0	0	0	0	0	-	-	-	-	-	-	-
45	63095.7	158.489	0	0	0	0	0	0	0	0	0	0	0	0	0	0	0	-	-	-	-	-	-	-

## Sheet: Cytokine analysis
										Table S1. Results of microbiological and cytokine profiling for all tested samples with corresponding depersonalized relevant clinical and demographic characteristics of each patient.
Patients' ID	CTACK	Eotaxin	Basic FGF	G-CSF	GM-CSF	GRO-alfa	HGF	IFN-alfa2	IFN-gamma	IL-1 alfa	IL-1 beta	IL-1ra	IL-2	IL-2R alfa	IL-3	IL-4	IL-5	IL-6	IL-7	IL-8	IL-9	IL-10	IL-12 (p70)	IL-12 (p40)	IL-13	IL-15	IL-16	IL-17	IL-18	IP-10	LIF	MCP-1	MCP-3	M-CSF	MIF	MIG	MIP-1 alfa	MIP-1 beta	beta-NGF	PDGF-BB	RANTES	SCF	SCGF-beta	SDF-1 alfa	TNF-alfa	TNF-beta	TRAIL	VEGF	Total protein, mg/mL
1	6.3678	0.352119	2.65085	19.3199	0	47.5347	17.2699	0	0.24661	3.05424	0.0872881	566.269	0.084322	1.13814	0.0173729	0.0474576	1.0661	22.0678	0.425	12.0305	10.5979	0.441102	0.0987288	1.42119	0.0220339	7.39788	9.46271	0.124576	1.38559	4.95127	3.42797	1.15254	0	0.616102	92.4	4.65593	0.075	6.99746	0.282203	70.461	205.657	1.13475	2869.97	12.4924	1.17627	15.3398	0.803814	0	23.6
2	7.56182	0.906061	3.43818	79.2539	0.718788	184.46	57.4188	0	0.138788	10.0176	1.00364	518.411	0.187273	1.56364	0.0333333	0.0969697	2.00121	19.9988	0.584242	249.229	13.5842	1.56303	0.0581818	4.69697	0.0193939	10.7048	13.257	0.26	1.74061	16.3782	7.77939	2.56182	0	2.79818	223.178	4.31758	1.26788	15.9764	0.536364	36.1073	375.068	1.98	5421.27	21.9818	5.13758	21.7958	6.55879	0.644242	16.5
3	2.52143	0.219388	81.7964	184.054	0.598469	155.843	215.23	0.459184	0.457143	26.0719	6.38724	1037.99	0.341837	2.67449	0.12551	0.185714	4.18673	237.75	0.187755	758.929	12.7985	0.332143	0.108673	12.5199	0.0214286	13.223	4.78418	0.745918	1.61582	3.60357	26.6398	2.62857	0.0903061	4.17245	70.3245	7.95969	0.689796	8.24082	0.539286	25.5092	502.618	1.85663	1105.25	6.25714	2.25153	19.448	3.25969	8.52245	19.6
5	11.1543	1.18875	30.4199	54.118	6.30965	61.5495	396.901	0.650804	0.367203	33.4013	8.19646	911.501	0.736977	5.85402	0.200965	0.212862	10.8222	122.502	0.371061	1917.15	9.09518	2.06013	0.199678	26.5383	0.0514469	16.6023	26.0373	1.04212	5.20965	33.5736	33.5055	10.5627	0.156592	3.49743	627.763	10.4437	1.30772	37.2248	1.29968	8.20514	322.986	2.70836	2498.64	13.7653	10.6814	14.2637	5.67942	7.21833	31.1
7	10.233	1.93562	28.8399	1832.41	0.372532	675.026	219.639	0.521459	0.280258	43.9661	4.70258	750.848	0.400429	3.89828	0.0725322	0.208584	6.82661	7530.32	1.04721	57236.1	14.8536	0.953648	0.135622	15.4755	0.0540773	13.921	58.4549	0.704721	3.89485	18.7052	49.5481	23.1571	0.158369	2.66781	265.435	4.94764	4.10129	42.4575	0.814163	38.8597	399.565	1.96652	3023.95	16.6129	5.21459	16.4923	4.69957	7.20815	23.3
9	6.15538	1.73692	212.998	381.257	1.56308	268.465	170.272	0.527692	1.12923	30.4923	1.95692	579.512	0.732308	6.11077	0.284615	0.432308	11.52	138.985	0.329231	1024.25	34.5108	0.976923	0.196923	16.9492	0.0646154	47.2092	21.5692	1.67077	4.97846	18.6354	39.4385	7.24615	0.133846	4.10923	456.851	6.38615	2.99538	40.9138	2.16923	69.0508	923.394	5.96615	3352.6	29.9523	13.8954	50.4338	8.76923	14.2862	6.5
10	19.7578	1.85556	176.324	1782.42	2.54444	817.382	566.307	0.606667	2.68667	63.3911	5.61111	1183.52	1.55333	22.8333	0.713333	0.555556	59.8644	1644.26	1.32444	1744.65	48.6644	1.05778	1.15556	44.8444	0.115556	89.4933	87.0756	2.00889	3.41111	38.5022	104.133	44.5289	0.18	4.78222	1026.64	13.0978	2.22444	55.9156	4.41556	53.3867	901.371	6.37778	8187.27	41.9178	13.8689	80.2222	11.04	42.0778	4.5
11	5.85967	0.687654	15.3535	44.7683	0.238272	95.6189	181.365	0.0395062	0.304115	2.73004	0.296296	618.11	0.251029	4.59053	0.0720165	0.0987654	0	18.8934	0.245267	285.561	9.10288	7.19342	0.121811	10.6868	0.017284	13.3481	16.9325	0.318107	5.33786	45.9444	16.1012	7.3823	0.0506173	5.12469	241.436	58.9922	0.822634	11.872	0.724691	14.8593	158.517	2.27243	7205.95	24.6469	2.26502	14.1082	6.70123	1.90535	24.3
12	8.26739	2.64783	12.8717	626.178	0.682609	2501.33	476.148	0	0.863043	2.83043	1.2587	1801.87	0.467391	9.84783	0.0826087	0.328261	0	512.307	2.98478	1405.33	40.9804	2.53043	0.136957	35.7587	0.0456522	60.7391	84.0848	1.10652	3.45217	186.189	49.1413	65.4	0.521739	15.2065	442.193	74.7	4.1913	41.1326	1.59783	83.1935	438.391	3.10217	7684.42	36.2935	4.66739	58.0761	22.137	28.5435	4.6
13	4.45995	1.28061	28.3615	33.1372	0.385459	104.624	240.214	0.319898	0.147194	9.03903	0.534949	478.287	0.373214	2.97015	0.0755102	0.12398	0.409184	20.8074	0.404337	178.175	6.87066	0.839031	0.0489796	14.3395	0.101786	9.5023	22.0329	0.500765	2.74337	16.0293	20.9214	6	0.0704082	1.92653	379.538	6.89694	1.15281	8.93776	0.587245	40.1321	270.846	1.9648	3316.97	16.5533	2.19515	10.4997	3.21097	5.09337	39.2
14	2.09813	0.123125	69.1863	99.9444	2.105	120.206	27.1181	0.630625	0.72	159.404	41.9513	1349.55	0.464375	2.50125	0.121875	0.265	0	28.4975	0	1668	9.71375	2.4775	0.039375	7.62937	0.00625	13.7506	3.19188	1.03438	10.3788	18.3163	63.3638	29.1725	0.29	6.775	120.945	14.3425	7.80938	66.3944	0.401875	104.362	509.339	2.03437	3936.99	5.92063	16.6794	13.2969	7.02187	28.4319	16
15	5.10667	2.47333	12.0067	258.493	0	4537.51	110.487	0	3.60667	5.30667	1.23333	10450.5	0.573333	7.88	0.213333	0.42	58.86	160.307	0	1069.67	129.22	2.95333	0.273333	9.2	0.346667	65.3333	54.4267	1.23333	18.1933	266.513	36.4267	98.64	0	6.77333	7582.63	34.44	3.11333	90.1333	0	75.84	704.62	6.55333	37661.5	54.3467	10.3733	185.673	56.5933	38.16	1.5
16	5.28674	0.953591	5.42265	50.1823	4.1232	77.247	47.9519	0	0.230939	28.3508	4.97127	1777.05	0.279558	2.9442	0.0773481	0.139227	0	41.1398	0.0524862	408.604	15.4122	0.778453	0.0823204	6.30663	0.0232044	13.8481	50.4613	0.657459	5.09669	17.9083	27.9983	3.85083	0.171271	1.13812	196.441	4.60608	2.41436	100.218	0.722652	120.645	572.891	1.91768	8252.37	12.0547	6.14033	25.2011	2.6453	5.77238	18.1
17	8.91016	0.917969	32.0883	65.1969	1.59688	117.887	411.075	0.150781	0.410156	17.5008	1.18516	726.31	0.395312	7.11797	0.105469	0.165625	2.95625	25.9484	0.465625	474.362	19.4102	1.29062	0.166406	23.3188	0.040625	27.8969	42.3031	1.25234	4.02656	65.3781	43.1844	4.69297	0.071875	2.41953	382.323	31.2219	1.79844	41.2602	1.51719	43.3687	849.588	2.50547	6543.94	27.8875	7.77187	28.8164	4.78984	0	12.8
18	7.35125	1.305	66	109.045	1.33375	310.569	414.589	0	1.4275	8.63	1.19875	1720.18	0.57625	11.5113	0.16875	0.24625	15.8387	61.8738	0.11875	331.225	35.3113	1.3975	0.34375	25.685	0.065	43.3088	57.6688	1.13	7.3175	39.9625	64.3075	10.235	0.3	4.90375	564.719	14.72	2.22375	74.9737	1.9325	261.267	1404.76	3.88875	18727.6	33.2525	6.28125	51.4925	15.6888	18.2812	8
19	5.71111	1.19259	122.339	360.407	2.74444	387.511	694.22	0.177778	2.07963	23.1519	3.02778	2631.95	0.657407	12.0759	0.214815	0.388889	27.1056	137.948	0	973.643	37.1537	3.00185	0.275926	33.5944	0	51.5	20.3352	1.23704	9.57037	36.1352	40.6889	10.3963	0	5.88704	351.348	13.5056	4.88519	58.2741	1.1463	23.563	661.65	5.18148	7045.49	17.3944	9.54815	55.9352	5.78519	33.2741	5.4
20	0.892254	0.0711268	7.54296	313.354	0.573239	200.342	1699.54	0.192254	0.0640845	25.7676	8.42535	1415.96	0.335211	1.17183	0.078169	0.180986	0	175.146	0.150704	1376.68	7.23099	1.05634	0	44.7535	0.00704225	11.0796	2.10493	0.507746	4.43239	0.203521	33.2732	3.53732	0.0485915	12.8444	56.9324	15.4282	1.09296	39.943	0.857042	3.16056	268.974	0.874648	1789.15	1.99366	2.84437	12.1669	1.57958	12.9965	14.2
21	5.28029	0.994265	65.353	102.033	0.563441	652.112	595.535	0.556272	0.201075	27.0627	3.79749	542.973	0.463082	4.1681	0.146595	0.199642	5.94265	62.8484	0.713262	655.092	9.79283	0.548387	0.164516	28.647	0.0354839	15.5495	32.51	0.882437	4.79498	18.0699	44.8767	4.33978	0.14086	3.26882	1149.47	3.85341	0.64086	9.90824	0.82509	20.029	323.88	2.61219	2137.01	12.6541	5.68674	14.7398	8.18602	11.5409	27.9
22	7.51388	1.36286	22.6208	53.4939	0.481633	1481.12	308.767	0.126122	0.212245	1.75633	0.631837	646.171	0.333061	4.51306	0.0604082	0.11551	9.10327	36.7204	0.440408	301.064	10.5629	1.22204	0.120816	16.9233	0.0171429	18.6992	23.8212	0.485714	4.24939	25.7049	15.7073	3.84653	0.0685714	1.28286	445.259	6.20857	1.52816	19.4963	1.31388	37.9257	403.489	2.10367	4451.78	20.691	1.99755	16.0996	3.59592	5.35918	24.5
23	6.78564	1.41923	5.5859	5.63692	0.194872	16.0908	90.5392	0	0.0679487	0.809487	0.0912821	194.25	0.0910256	1.78179	0.0125641	0.0741026	0	3.31179	0.276667	11.7715	7.31949	0.615641	0	5.45667	0.0133333	4.37026	3.74744	0.171282	1.23256	9.61026	4.39769	1.33692	0	0.546667	215.705	4.83179	0.297179	6.04897	0.32359	28.3867	221.941	1.09231	3378.61	20.8664	1.00179	10.7054	1.93667	2.19385	39
24	8.79899	0.858081	27.3131	79.3591	2.01263	54.0636	743.54	0.509596	1.07525	10.1141	0.760606	1055.08	1.15051	4.55909	0.325253	0.212626	7.56364	25.6631	0.108081	439.621	8.47222	1.60152	0.20101	37.4788	0.142929	20.952	10.4571	0.653535	10.0242	41.9859	36.7399	29.0525	0.219697	2.36263	145.073	14.2611	5.21111	78.2975	2.29899	101.309	538.917	2.00707	8295.46	20.9783	5.29242	12.2525	1.27879	12.9232	19.8
25	8.58549	1.10155	37.2368	65.6337	0.723316	76.0451	492.324	0.545078	0.529534	11.9104	1.38083	978.784	0.95544	7.28705	0.320207	0.242487	13.8321	21.0855	0.262694	179.236	14.6176	1.61244	0.248705	29.9565	0.0373057	25.1969	43.2663	1.74508	5.72228	72.0399	26.3073	40.8166	0.0782383	2.57047	1355.86	12.943	5.89223	99.8782	2.33575	27.999	464.969	3.67202	7307.77	32.9917	4.29275	24.1948	5.46269	7.6285	19.3
26	3.58288	0.583333	113.723	147.273	0.366667	380.547	689.56	0.746847	0.317117	14.9838	1.28423	461.148	0.543694	3.5009	0.142342	0.244595	0	24.9613	0.143243	516.365	7.10901	0.468919	0.0765766	30.5441	0.00720721	16.9144	6.86396	0.884234	12.5207	17.695	27.5086	10.445	0.142793	14.4563	119.448	7.6464	1.36847	12.2369	0.996396	9.36532	454.274	2.73333	3302.93	9.18198	6.62838	10.3342	2.49054	7.27432	22.2
27	7.82038	1.44133	9.69143	13.5198	2.53943	17.5535	222.584	0.246286	0.162286	15.413	1.25067	299.791	0.281333	2.67352	0.0678095	0.0977143	4.46629	24.2326	0.205524	342.185	6.38762	0.844	0.0874286	13.8684	0.0171429	8.79067	11.4122	0.361714	1.92952	7.11695	12.9046	3.63352	0.0485714	1.46324	502.918	1.9141	0.964952	17.0573	0.782667	3.76171	171.836	0.888762	763.728	11.5415	3.25276	8.56705	1.9941	3.81124	52.5
28	10.6784	1.39267	18.4974	15.9621	0.313793	48.6987	212.099	0.0413793	0.0461207	1.04095	0.306466	155.058	0.301293	3.33793	0.0797414	0.099569	0.955172	13.4513	0.293534	36.7737	11.7047	3.19871	0.0827586	26.9823	0.0137931	13.4823	18.8414	0.356034	1.90776	39.0978	13.7409	1.28922	0.0241379	1.06509	520.779	17.106	0.397845	9.53922	1.05991	18.9539	381.099	1.51681	8302.17	33.7556	2.47543	17.5315	3.66466	4.07974	23.2
29	0.492593	0.111852	194.211	31.0622	0.265926	52.4593	57.3022	0.957778	0.322222	79.5874	98.0548	1352.79	0.582963	5.82	0.219259	0.383704	0	46.1467	0	620.841	3.04444	4.8963	0.0948148	10.7719	0	22.6415	4.00741	1.85259	10.4993	0.562222	198.741	7.61185	0.199259	82.4844	239.975	2.87556	0.221481	2.44444	1.60519	16.4341	32.9407	3.56148	1664.37	0.976296	7.02222	3.98815	9.84889	57.8326	13.5
30	4.76667	1.52	5.59333	201.567	0	1220.2	19.4267	0	5.68	2.6	2.04	7636.29	0	3.14667	0	0.166667	13.4267	19.7067	0	185.707	102.753	0	0	0	0.0666667	96.9933	16.54	0.86	1.48	11.1867	17.72	4.58667	0	1.62667	2707.11	2.91333	1.38667	76.3133	2.72667	36.3133	435.46	1.94	5988.95	34.32	10.0667	140.867	12.6467	114.7	1.5
31	7.15086	1.21143	78.98	24.1503	1.21714	55.4537	639.606	0.694286	0.266857	9.36686	1.28571	570.819	0.965714	7.47257	0.328571	0.246857	10.3354	7.44971	0.340571	141.913	13.7863	1.304	0.320571	36.8566	0.0817143	27.1349	28.1514	1.10743	5.38286	15.1497	26.5554	2.93771	0.132571	2.60286	879.541	7.168	1.29143	24.7771	2.94286	69.4891	616.254	3.41314	4182.37	23.76	6.42343	23.2909	2.80971	11.1166	17.5
32	10.3686	2.10392	67.7882	3207.43	0.62549	1945.82	141.247	0.378431	2.81569	51.4451	3.68627	1712.79	0.933333	6.68431	0.141176	0.358824	23.1529	2235.11	1.49804	4723.09	34.0451	2.28235	0.292157	13.5412	0.121569	29.9431	57.2196	1.20588	5.14902	257.161	102.004	321.357	3.28039	10.5431	897.806	61.049	5.29608	35.7882	0.709804	31.9608	282.231	3.63529	6746.45	31.1098	24.5667	53.4784	8.59412	21.8	5.1
33	8.97805	2.52509	34.9767	286.881	0.406272	660.365	277.272	0.351568	0.315679	9.35889	4.04286	638.201	0.365505	4.39652	0.132404	0.173171	4.74355	69.0589	0.402091	550.07	11.6258	0.259582	0.12439	13.7446	0.0407666	15.4836	43.0411	0.969338	2.76307	12.0101	16.277	1.42334	0.0728223	1.90592	699.574	2.66864	1.92892	26.2174	1.00488	36.7341	309.087	2.0108	2270.97	19.9303	2.55052	15.3035	2.74878	9.94251	28.7
34	5.73562	1.66986	368.849	107.519	2.08767	638.863	1831.43	2.68493	0.768493	60.5521	4.97123	799.5	1.86849	18.7712	0.778082	0.805479	31.0014	50.2575	0.568493	348.873	31.3849	1.04247	0.657534	94.1767	0.135616	69.0219	90.4877	4.82329	8.16712	49.0164	69.0247	15.5904	0.530137	12.1959	10651.2	11.1877	2.98904	43.3644	4.91233	24.3301	1043.54	10.5671	4375.59	37.6068	19.8699	49.7548	17.5068	22.3767	7.3
35	2.71364	0.457273	22.1264	48.2845	1.56182	113.109	477.282	0	0.196364	8.52364	0.858182	820.795	0.280909	4.80545	0.0554545	0.128182	0	51.72	0	273.554	24.7536	2.50636	0.0772727	24.5764	0.0290909	25.9864	27.0982	1.77273	1.92545	15.3891	24.7136	1.89636	0	1.32182	874.334	10.97	1.82545	23.3036	2.02091	66.7827	494.503	1.70727	6535.5	7.31091	4.80636	36.4555	2.65909	13.34	11
36	1.8312	0.6896	81.2456	36.7664	3.236	58.4464	1537.62	0.7728	0.5872	5.6584	0.7272	826.937	2.2336	10.1608	0.5248	0.2568	13.5328	36.4128	0	148.385	15.316	1.0416	0.3184	75.1432	0.0256	31.1456	31.1168	1.6528	4.9536	39.7024	78.664	12.2512	0.2744	3.3648	1324.62	42.4888	1.3344	21.4168	2.3072	18.308	216.074	5.8776	17852.6	9.9808	7.4136	25.072	41.3752	19.5136	12.5
37	4.15625	2.0125	28.1312	68.1562	0	210.225	173.206	0	2.0625	0.7375	0.725	4592.17	0	1.8125	0	0.10625	0	43.4125	0	187.65	62.5312	0.00625	0	0	0.0625	0	24.8562	0.3625	2.0375	143.812	12.2437	42.0187	0	1	3594.31	26.125	2.175	43.95	0	24.0937	212.025	2.93125	28933.5	67.9625	6.2625	83	23.2187	0	1.6
38	12.8262	3.60952	95.3738	256.826	0.783333	533.1	261.879	0	1.98333	11.8524	3.80714	3273.56	0.283333	4.4881	0.192857	0.266667	0	233.212	2.0119	285.648	48.8167	0.264286	0	17.45	0.180952	0	68.3024	1.08571	1.30238	21.6667	12.5595	9.30238	0	3.25238	880.914	5.6619	0.67381	27.7214	0.861905	14.119	449.624	3.77619	4981.37	52.65	15.8881	66.0762	13.2238	93.25	4.2
39	13.6492	1.65085	105.107	269.825	1.17966	1198.26	378.358	0	0.20678	5.86441	1.37119	1045.45	0.337288	9.00847	0.0881356	0.279661	0	41.7712	0.452542	554.112	25.5	1.13051	0	28.2	0.0355932	40.9915	37.2492	1.95085	4.34746	26.3085	26.1	3.58305	0	3.85763	978.885	2.8661	2.69831	39.761	1.20678	30.2492	1197.68	3.10169	5419.36	52.0864	8.70169	40.0136	7.37458	14.0797	5.9
40	6.88788	1.07778	65.8636	90.5586	1.47677	75.3727	1099.6	0.532323	0.587879	12.4222	2.14343	1378.71	0.779798	9.75556	0.155556	0.305051	14.2687	52.8263	0.0959596	520.831	21.8606	1.63737	0.360606	52.8616	0.0525253	36.9061	80.3556	2.06061	4.28687	114.229	43.1495	3.9697	0.169697	3.86465	2556.1	26.6596	4.45556	63.1465	2.32525	16.8111	317.695	6.20101	17131.2	22.8677	7.95758	32.3667	20.1253	23.7253	9.9
41	13.6253	1.67848	27.1051	60.4759	0.492405	313.532	142.711	0	0.0708861	6.13038	1.00506	1588.07	0.212658	4.91646	0.00632911	0.148101	2.80506	24.0646	0	268.972	25.3025	1.35696	0.135443	10.8633	0.0126582	27.8494	34.0987	0.406329	3.28987	112.946	17.243	15.0797	0	4.92025	1655.35	29.1975	2.15949	24.8241	1.48228	66.0747	395.108	2.68481	12569.2	45.0443	6.02911	37.8139	10.7696	21.8367	7.9
42	5.78793	0.531034	105.04	358.822	1.4569	302.903	1266.02	0.165517	0.351724	14.8793	3.86207	1459.6	0.558621	9.90862	0.134483	0.315517	14.4552	258.26	0.163793	382.928	36.7431	1.52759	0.256897	63.9293	0.0551724	53.1121	115.552	1.46897	2.23448	28.3448	44.9121	4.16379	0	3.87069	380.784	7.75345	1.97069	46.9655	3.65862	17.019	553.129	4.40862	9077.08	23.3069	6.24138	55.5362	10.319	24.8793	5.8
43	7.41034	1.27241	18.7966	95.6466	0	1347.37	77.3707	0	0.860345	2.30345	0.574138	3449.36	0	1.58276	0	0.127586	0	24.9603	0.163793	273.429	36.8069	0.191379	0	4.13103	0.0551724	0	47.4517	2.09655	1.68793	22.7845	11.869	3.0569	0	0.958621	1902.81	7.5569	2.85517	82.5741	0	49.1741	888.047	1.88621	5702.87	32.8897	6.3931	53.8034	8.43276	22.1069	5.8
44	10.1395	2.66053	61.5684	231.203	0.457895	807.176	473.097	0	0.468421	5.28947	1.27895	2087.1	0.184211	4.87632	0	0.307895	0	77.9158	1.33421	437.205	43.1289	2.82105	0	35.2132	0.0263158	0	30.3711	1.12895	4.10789	397.308	19.7105	13.9263	0	3.52632	1554.42	92.3395	3.93421	46.0816	0.128947	15.6053	298.921	4.81579	24363.8	63.5395	11.3816	69.3947	40.7947	1.86053	3.8
45	9.2075	1.6125	20.6031	63.96	3.1825	48.6825	407.834	0.255	0.401875	5.47875	0.864375	1234.37	0.754375	6.91062	0.234375	0.213125	11.565	37.375	0.059375	400.052	17.5162	0.396875	0.223125	24.2325	0.02	24.3325	18.1844	1.62688	1.345	29.225	30.5881	1.39	0.094375	1.35187	664.57	10.2462	5.78937	67.7812	2.08125	21.8381	586.702	2.52813	12072.5	28.1962	6.15062	26.3337	5.75625	15.7531	16
[truncated: 1 more columns]

## Sheet: Notes
Clinical data is presented in a binary fation (1 - yes, 0 - no). Microbiological analysis was carried out using a broad real-time polymerase chain reaction panel ‘Femoflor 16’, ‘TNC Complex’, ‘Herpes Multiplex’ (cat# R1-P801-S3/6, R1-P111-S3/9, R1-P210-S3/9, respectively, (DNA-Technology, Moscow, Russia). In accordance to the manufacturer's instructions using automated software.Quantitative data …
